# Supplementary material for: Phosphorylation in intrinsically disordered regions regulates the activity of Neurogenin2
Source: PubMed Central journal article supplement (PMC4422318; doi:10.1186/s12858-014-0024-3), 2014-11-06

SUPPLEMENTARY FIGURE 2

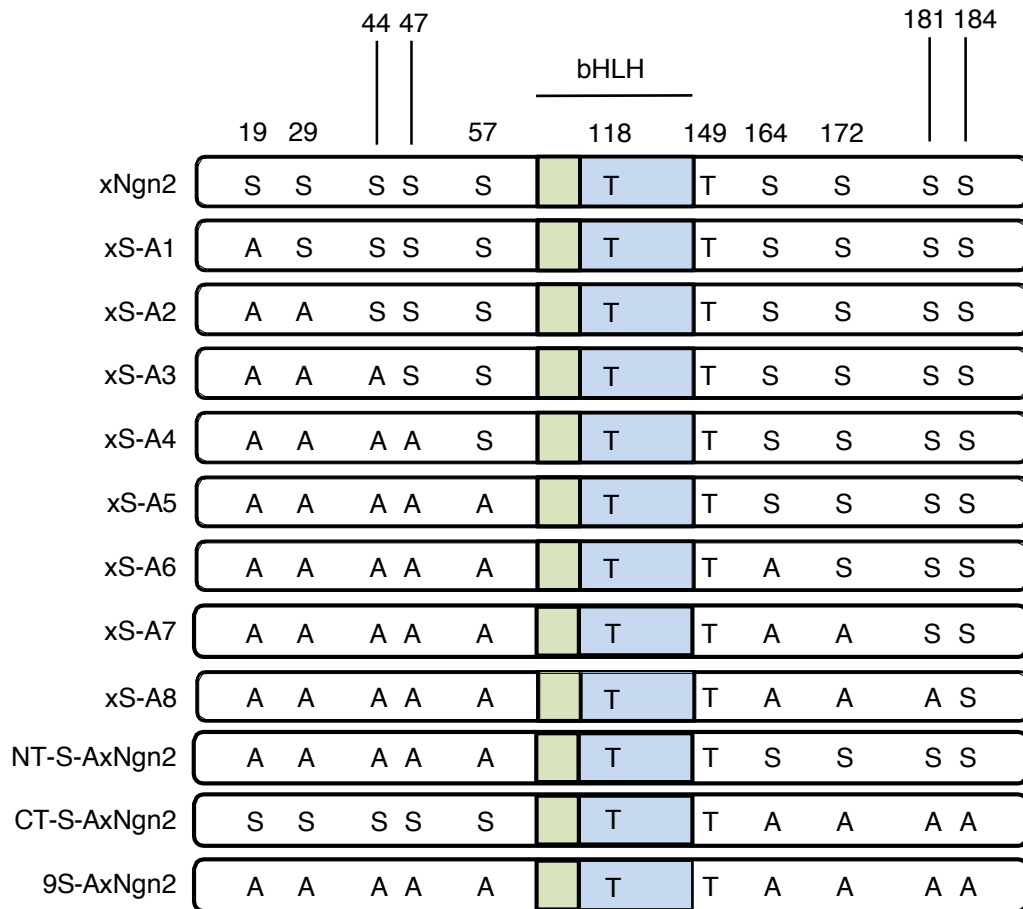

Supplement: s12858-014-0024-3-S2.pdf [file s12858-014-0024-3-S2.pdf]
